# Supplementary material for: Second Life of Post-Mining Infrastructure in Light of the Circular Economy and Sustainable Development—Recent Advances and Perspectives
Source: MDPI journal article supplement (doi:10.3390/en14227551), 2021-11-12
Supplement: s1 [file s1]

---

*Article*

# Second Life of Post-Mining Infrastructure in Light of the Circular Economy and Sustainable Development—Recent Advances and Perspectives

Katarzyna Pactwa <sup>1,\*</sup>, Martyna Konieczna-Fuławka <sup>1</sup>, Krzysztof Fuławka <sup>2</sup>, Päivi Aro <sup>3</sup>, Izabela Jaśkiewicz-Proć <sup>2</sup> and Aleksandra Kozłowska-Woszczycka <sup>1</sup>

<sup>1</sup> Faculty of Geoengineering, Mining and Geology, Wrocław University of Science and Technology, 15 Na Grobli Street, 50-421 Wrocław, Poland; martyna.konieczna-fulawka@pwr.edu.pl (M.K.-F.); aleksandra.kozlowska@pwr.edu.pl (A.K.-W.)

<sup>2</sup> KGHM Cuprum Ltd. Research & Development Centre, 2-8 Sikorskiego Street, 53-659 Wrocław, Poland; kfulawka@cuprum.wroc.pl (K.F.); ijaskiewicz@cuprum.wroc.pl (I.J.-P.)

<sup>3</sup> School of Business and Information Management, Oulu University of Applied Sciences, Business, Yliopistonkatu 9, 90570 Oulu, Finland; paivi.aro@oamk.fi (P.A.)

\* Correspondence: katarzyna.pactwa@pwr.edu.pl; Tel.: +48-71-320-68-51

## Supplementary Materials

### SWOT analysis of Underground mine reclamation methods

**Table S1.** Way of underground space repurposing: underground farming.

| Strengths                                                                                    | Weaknesses                                                 | Threats                                                                                           | Opportunities                                                                                                      |
|----------------------------------------------------------------------------------------------|------------------------------------------------------------|---------------------------------------------------------------------------------------------------|--------------------------------------------------------------------------------------------------------------------|
| Constant temperature and other atmospheric conditions                                        | The need to provide artificial lighting                    | The occurrence of natural risks like floods, gases, seismic activity, lack of lightning           | The possibility of breeding species that are difficult or impossible to maintain due to climate in certain country |
| Sustainable agriculture - no need to convert land into agricultural (often by deforestation) | Lack of natural ventilation                                | Legal obstacles and regulations (or lack thereof) to new underground activities                   | The possibility of guided tours                                                                                    |
| Isolating invasive species from the natural ecosystem (e.g. In the case of exotic farms)     | Limited and relatively expensive space                     | Safety issues - accidents might be caused by old infrastructure                                   | Accelerated vegetation                                                                                             |
| Infrastructure                                                                               | Safety issues (personal protection)                        | Big investment costs                                                                              | The possibility of breeding both plants and animals - for example, some insects                                    |
| Closed ecological system                                                                     | The need for constant monitoring of safety parameters      | Need for an entirely new business model                                                           | Cooperation with schools and universities                                                                          |
| The ability to control weather conditions                                                    | Possible seismic activity                                  | New, qualified staff is needed                                                                    | New workplace for local people                                                                                     |
| Environmentally friendly                                                                     | More strict/limited working hours due to harsh environment | Environmental restrictions                                                                        | The possibility of obtaining a subsidy                                                                             |
| Farming possible all year round                                                              | Possible seismic activity and problem with ground control  | Space/area limitations                                                                            | Farming in closed-loop system requires less water consumption                                                      |
| Prepared infrastructure                                                                      |                                                            | In urbanised areas, further incidents related to seismicity and ground settlement may be observed | Alternative source of food production and minimization of food shortages                                           |
| Reclamation has support from local authority                                                 |                                                            |                                                                                                   | Academic assistance                                                                                                |
| Support of mine employees will be required                                                   |                                                            |                                                                                                   | Diversification of income sources                                                                                  |
|                                                                                              |                                                            |                                                                                                   | Public private Partnerships (PPP)                                                                                  |
|                                                                                              |                                                            |                                                                                                   | Fulfil the requirements of circular economy and sustainable development.                                           |

**Table S2.** Way of underground space repurposing: physical, asrtophysical, measurements.

| Strengths                                                                                      | Weaknesses                                                           | Threats                                                                                           | Opportunities                                                                                           |
|------------------------------------------------------------------------------------------------|----------------------------------------------------------------------|---------------------------------------------------------------------------------------------------|---------------------------------------------------------------------------------------------------------|
| Closed ecological system,                                                                      | Need of additional specialized staff                                 | The occurrence of natural risks like floods, gases, seismic activity, lack of lightning           | The possibility of obtaining a subsidy                                                                  |
| The ability to conduct (even dangerous) experiments without affecting the external environment | Limited and relatively expensive space                               | During the underground research water poisoning is possible                                       | Cooperation with schools and universities                                                               |
| Constant temperature and other atmospheric conditions                                          | Safety issues (personal protection)                                  | Legal obstacles and regulations (or lack thereof) to new underground activities                   | The possibility of conducting even dangerous experiments without affecting the environment              |
| Isolation from external factors                                                                | The need to provide artificial lighting                              | Safety issues - accidents might be caused by old infrastructure                                   | Wide range of research possibilities                                                                    |
| Interdisciplinary research approach                                                            | Lack of natural ventilation                                          | Scaling down of facilities and loss of scientific potential if case of lack of external funding   | A place for testing new technologies for the military, space organizations, etc.                        |
| Researched and documented geology and Geophysics                                               | The need for constant monitoring of safety parameters                | Need for an entirely new business model                                                           | Fulfil the requirements of circular economy and sustainable development                                 |
| Prepared infrastructure                                                                        | More strict/limited working hours due to harsh environment           | New, qualified staff is needed                                                                    | Workshops and camp of science                                                                           |
| Room for laboratories without need of major changes                                            | Once disturbed formation is not adequate to study natural conditions | Environmental restrictions                                                                        | Opportunities of new technology development                                                             |
| Support of mine employees will be required                                                     | Possible seismic activity and problem with ground control            | Uncertain future – profits may be not enough to maintain whole infrastructure and staff           | Safety storage for documents or servers                                                                 |
|                                                                                                |                                                                      | Space/area limitations                                                                            | Lobbying or research organizations support                                                              |
|                                                                                                |                                                                      | In urbanised areas, further incidents related to seismicity and ground settlement may be observed | Establishing a new business environment                                                                 |
|                                                                                                |                                                                      |                                                                                                   | Diversification of income sources                                                                       |
|                                                                                                |                                                                      |                                                                                                   | This type of reclamation has a great possibility of getting support from local authorities and EU found |
|                                                                                                |                                                                      |                                                                                                   | Incubator of business                                                                                   |
|                                                                                                |                                                                      |                                                                                                   | Public private Partnerships (PPP)                                                                       |



**Table S3.** Way of underground space repurposing: development of new mining technologies.

| Strengths                                                                                                           | Weaknesses                                                                          | Threats                                                                                           | Opportunities                                                                                                                              |
|---------------------------------------------------------------------------------------------------------------------|-------------------------------------------------------------------------------------|---------------------------------------------------------------------------------------------------|--------------------------------------------------------------------------------------------------------------------------------------------|
| Unique environment which allows to test new technologies in real working conditions                                 | Safety issues (personal protection)                                                 | The occurrence of natural risks like floods, gases, seismic activity, lack of lightning           | The possibility of obtaining a subsidy from local government, or EU                                                                        |
| Occurrence of multiple factors affecting efficiency of equipment which cannot be simulated in laboratory conditions | Risk that there will be no external customers which will provide sufficient incomes | During the underground tests ground control problems may be induced                               | Cooperation with business, universities and R&D centres                                                                                    |
| Prepared infrastructure                                                                                             | The need to maintain infrastructure and media what is related to high costs         | Legal obstacles and regulations (or lack thereof) to new underground activities                   | New technologies, will affect the efficiency and sustainability of mineral and CRMs extraction                                             |
| Room for laboratories without need of major changes                                                                 | Lack of natural ventilation                                                         | Safety issues and high accident rates related to the risky environment                            | The best trail site for new mining technologies testing and development                                                                    |
| No need of additional highly qualified staff                                                                        | The need for constant monitoring of safety parameters                               | There is a risk that innovative equipment, machines and sensors will be damaged or even destroyed | Due to the lack of such facilities, there is high possibility of international cooperation                                                 |
| Support of mine employees will be required                                                                          | More strict/limited working hours due to harsh environment                          | Uncertain future – profits may be not enough to maintain whole infrastructure and staff           | Such facilities may be set up during the process of regular mine exploitation. There is no need for waiting until the end of mining works. |
|                                                                                                                     |                                                                                     | In urbanised areas, further incidents related to seismicity and ground settlement may be observed | Allow to maintain jobs for local community with no need to retrain of the employees                                                        |
|                                                                                                                     |                                                                                     | Lack of clients                                                                                   | Fulfil the requirements of circular economy and sustainable development.                                                                   |

**Table S4.** Way of underground space repurposing: tourism.

| Strengths                                                                         | Weaknesses                                                                                                       | Threats                                                                                      | Opportunities                                                                      |
|-----------------------------------------------------------------------------------|------------------------------------------------------------------------------------------------------------------|----------------------------------------------------------------------------------------------|------------------------------------------------------------------------------------|
| Interesting and unique infrastructure and environment                             | Safety issues (personal protection)                                                                              | The risk of accidents, heart attacks and other health detriment due to the harsh environment | The possibility of obtaining a subsidy from local government and EU                |
| There is no need to incur additional significant costs                            | Risk that tourists won't come back again (underground site won't change significantly due to safety regulations) | Legal obstacles and regulations (or lack thereof) to new underground activities              | Cooperation with schools and universities                                          |
| Affect on development of local tourism - Historical area with mining traditions   | The need to provide artificial lighting                                                                          | Safety issues - accidents might be caused by old infrastructure                              | Virtual tour                                                                       |
| Qualified staff is available                                                      | Lack of natural ventilation                                                                                      | Tourism might not generate enough income to maintain the infrastructure                      | Entertainment events                                                               |
| Open all year round                                                               | The need for constant monitoring of safety parameters                                                            | The constant need to acquire new customers and promote facility                              | Historical centre of knowledge About the mine                                      |
| Prepared infrastructure                                                           | Difficult access to particular places in the mine due to safety issues                                           | Environmental restrictions                                                                   | Mining study area for mining schools                                               |
| Highly probable that this way of reclamation will be supported by local authority | Additional security measures are required to ensure the safety of visitors                                       | Lack of clients                                                                              | Academic assistance                                                                |
| Support of mine employees will be required                                        | Possible problems with ground control                                                                            | Need for an entirely new business model                                                      | Workshops and camp of science                                                      |
|                                                                                   | Only the safest part of the mine may be part of the tourist route                                                |                                                                                              | Possible development of underground facilities for purposes different than tourism |
|                                                                                   |                                                                                                                  |                                                                                              | Possibility to create attractions such as adventure park or escape rooms           |
|                                                                                   |                                                                                                                  |                                                                                              | School and academic trips                                                          |
|                                                                                   |                                                                                                                  |                                                                                              | Public private Partnerships (PPP)                                                  |
|                                                                                   |                                                                                                                  |                                                                                              | Fulfil the requirements of circular economy and sustainable development            |

**Table S5.** Way of underground space repurposing: research and development.

| Strengths                                                                                      | Weaknesses                                                                  | Threats                                                                                           | Opportunities                                                                              |
|------------------------------------------------------------------------------------------------|-----------------------------------------------------------------------------|---------------------------------------------------------------------------------------------------|--------------------------------------------------------------------------------------------|
| Closed ecological system,                                                                      | Need of additional specialized staff (depend on type of R&D activities)     | The occurrence of natural risks like floods, gases, seismic activity, lack of lightning           | The possibility of obtaining a subsidy                                                     |
| The ability to conduct (even dangerous) experiments without affecting the external environment | The need to maintain infrastructure and media what is related to high costs | During the underground research water poisoning is possible                                       | Cooperation with schools and universities                                                  |
| Constant temperature and other atmospheric conditions                                          | Safety issues (personal protection)                                         | Legal obstacles and regulations (or lack thereof) to new underground activities                   | The possibility of conducting even dangerous experiments without affecting the environment |
| Isolation from external factors                                                                | The need to provide artificial lighting                                     | Safety issues - accidents might be caused by old infrastructure                                   | Wide range of research possibilities                                                       |
| Interdisciplinary research approach                                                            | Lack of natural ventilation                                                 | Scaling down of facilities and loss of scientific potential if case of lack of external funding   | A place for testing new technologies for the military, space organizations, etc.           |
| Researched and documented geology and geophysics                                               | The need for constant monitoring of safety parameters                       | Need for an entirely new business model                                                           | Academic assistance                                                                        |
| Prepared infrastructure                                                                        | More strict/limited working hours due to harsh environment                  | New, qualified staff is needed                                                                    | Workshops and camp of science                                                              |
| Room for laboratories without need of major changes                                            | Once disturbed formation is not adequate to study natural conditions        | Environmental restrictions                                                                        | Opportunities of new technology development                                                |
| Support of mine employees will be required                                                     | Possible seismic activity and problem with ground control                   | Uncertain future – profits may be not enough to maintain whole infrastructure and staff           | Safety storage for documents or servers                                                    |
| Highly probable that this way of reclamation will be supported by local and EU Funds           | More strict/limited working hours due to harsh environment                  | Space/area limitations                                                                            | Lobbying or research organizations support                                                 |
| Suitable place for innovative R&D projects                                                     |                                                                             | In urbanised areas, further incidents related to seismicity and ground settlement may be observed | Establishing a new business environment                                                    |
| Diversification of income sources                                                              |                                                                             |                                                                                                   |                                                                                            |

Public private  
Partnerships (PPP)  
Fulfil the requirements of circular  
economy and sustainable  
development

**Table S6.** Way of underground space repurposing: liquidation by backfilling/flooding.

| Strengths                                                        | Weaknesses                                                                                                  | Threats                                                    | Opportunities                                                                             |
|------------------------------------------------------------------|-------------------------------------------------------------------------------------------------------------|------------------------------------------------------------|-------------------------------------------------------------------------------------------|
| A well-known, widely used solution                               | No new workplaces after mine closure                                                                        | Not an innovative approach                                 | Socially accepted by the general public                                                   |
| Once the mine is closed, no further maintenance will be required | Long-time monitoring of the backfill and shaft condition might be needed                                    | Affects of high local unemployment rate after mine closure | Prevent further costs related to compensation for damages of buildings, roads and trails. |
| No additional cost after the mine is closed                      | Does not fulfil the goals of CE and SD                                                                      |                                                            | Using energy from the mining waters of closed mining plants/flooded mines                 |
| Short time required for liquidation                              | Facility is permanently damaged, destroyed and any repurpose activities in future are related to high costs |                                                            |                                                                                           |
| Relatively low costs of mine liquidation                         |                                                                                                             |                                                            |                                                                                           |
| Cheap and available backfilling materials                        |                                                                                                             |                                                            |                                                                                           |
| Prevent ground settlement and infrastructure damages             |                                                                                                             |                                                            |                                                                                           |
| Prevent mining induced seismic activity                          |                                                                                                             |                                                            |                                                                                           |

**Table S7.** Way of underground space repurposing: waste disposal.

| Strengths                                                            | Weaknesses                                                                                    | Threats                                                | Opportunities                                               |
|----------------------------------------------------------------------|-----------------------------------------------------------------------------------------------|--------------------------------------------------------|-------------------------------------------------------------|
| A well-known, widely used solution                                   | No new workplaces after mine closure                                                          | Not an innovative approach                             | Backfilling with waste (for example post-flotation waste)   |
| Once the mine is closed, no further maintenance will be required     | During the waste storing process, the mine generates only costs, without significant incomes. | After filling up with wastes the mine cannot be reused | Possibility of storage highly dangerous radioactive wastes. |
| No additional cost after mine closure                                | Does not fulfil the goals of CE and SD                                                        | Possible contamination of underground water            | Socially accepted by the general public                     |
| Relatively low costs of mine liquidation                             |                                                                                               |                                                        |                                                             |
| It makes it possible to slow down the increase in local unemployment |                                                                                               |                                                        |                                                             |



---

during the phase of  
filling mines with wastes

---

Prevent ground  
settlement and  
infrastructure damages

---

Prevent mining induced  
seismic activity

---

**Table S8.** Way of underground space repurposing: multi-purpose facility.

| Strengths                                                                                              | Weaknesses                                                                  | Threats                                                                                         | Opportunities                                                                              |
|--------------------------------------------------------------------------------------------------------|-----------------------------------------------------------------------------|-------------------------------------------------------------------------------------------------|--------------------------------------------------------------------------------------------|
| Diversification of costs and incomes                                                                   | Need of additional specialized staff (depend on type of R&D activities)     | The occurrence of natural risks like floods, gases, seismic activity, lack of lightning         | The possibility of obtaining a subsidy national and EU                                     |
| The ability to conduct (even dangerous) experiments without affecting the external environment         | The need to maintain infrastructure and media what is related to high costs | During the underground research water poisoning is possible                                     | Cooperation with schools and universities                                                  |
| Constant temperature and other atmospheric conditions                                                  | Safety issues (personal protection)                                         | Legal obstacles and regulations (or lack thereof) to new underground activities                 | The possibility of conducting even dangerous experiments without affecting the environment |
| Isolation from external factors                                                                        | The need to provide artificial lighting                                     | Safety issues - accidents might be caused by old infrastructure                                 | Wide range of research possibilities                                                       |
| Interdisciplinary research approach                                                                    | Lack of natural ventilation                                                 | Scaling down of facilities and loss of scientific potential if case of lack of external funding | A place for testing new technologies for the military, space organizations, etc.           |
| Mine may be divided into segments for different parts of activities (tourism, R&D, Backfilling)        | The need for constant monitoring of safety parameters                       | Need for an entirely new business model                                                         | Academic assistance                                                                        |
| Prepared infrastructure                                                                                | More strict/limited working hours due to harsh environment                  | New, qualified staff is needed                                                                  | Workshops and camp of science                                                              |
| Room for laboratories without need of major changes                                                    | Once disturbed formation is not adequate to study natural conditions        | Environmental restrictions                                                                      | Opportunities of new technology development                                                |
| Support of mine employees will be required – slow down or even prevent unemployment after mine closure | Possible seismic activity and problem with ground control                   | Uncertain future – profits may be not enough to maintain whole infrastructure and staff         | Safety storage for documents or servers                                                    |
| Highly probable that this way of reclamation will be supported by local and EU Funds                   | More strict/limited working hours due to harsh environment                  | Space/area limitations                                                                          | Lobbying or research organizations support                                                 |
| Suitable place for innovative R&D projects                                                             |                                                                             | In urbanised areas, further incidents related to seismicity                                     | Establishing a new business environment                                                    |

| Strengths | Weaknesses | Threats                                    | Opportunities                                                                                                                                                        |
|-----------|------------|--------------------------------------------|----------------------------------------------------------------------------------------------------------------------------------------------------------------------|
|           |            | and ground settlement<br>may be observed   |                                                                                                                                                                      |
|           |            | Need for an entirely<br>new business model | Diversification of income sources                                                                                                                                    |
|           |            |                                            | Public private<br>Partnerships (PPP)                                                                                                                                 |
|           |            |                                            | Fulfil the requirements of circular<br>economy and sustainable develop-<br>ment                                                                                      |
|           |            |                                            | Attractive for commercial custom-<br>ers, scientists and tourists                                                                                                    |
|           |            |                                            | Combination of different research<br>facilities with tourism will affect<br>on tourist potential (if possible to<br>show underground labs/facilities<br>to visitors) |
|           |            |                                            | Partly backfilled workings will al-<br>low to reduce wastes on surface<br>and will affect on safety in under-<br>ground                                              |
